# Supplementary material
Source: PubMed Central journal article supplement (PMC5799869)
Supplement: am7b17892_si_001.pdf [file am7b17892_si_001.pdf]

## SUPPORTING INFORMATION

### **Full Color Camouflage in a Printable Photonic Blue-Colored Polymer**

*Monali Moirangthem, Albertus P.H.J. Schenning\**

Functional Organic Materials & Devices, Eindhoven University of Technology, P.O. Box 513,  
5600 MB Eindhoven, The Netherlands

Corresponding author e-mail address: [a.p.h.j.schenning@tue.nl](mailto:a.p.h.j.schenning@tue.nl)

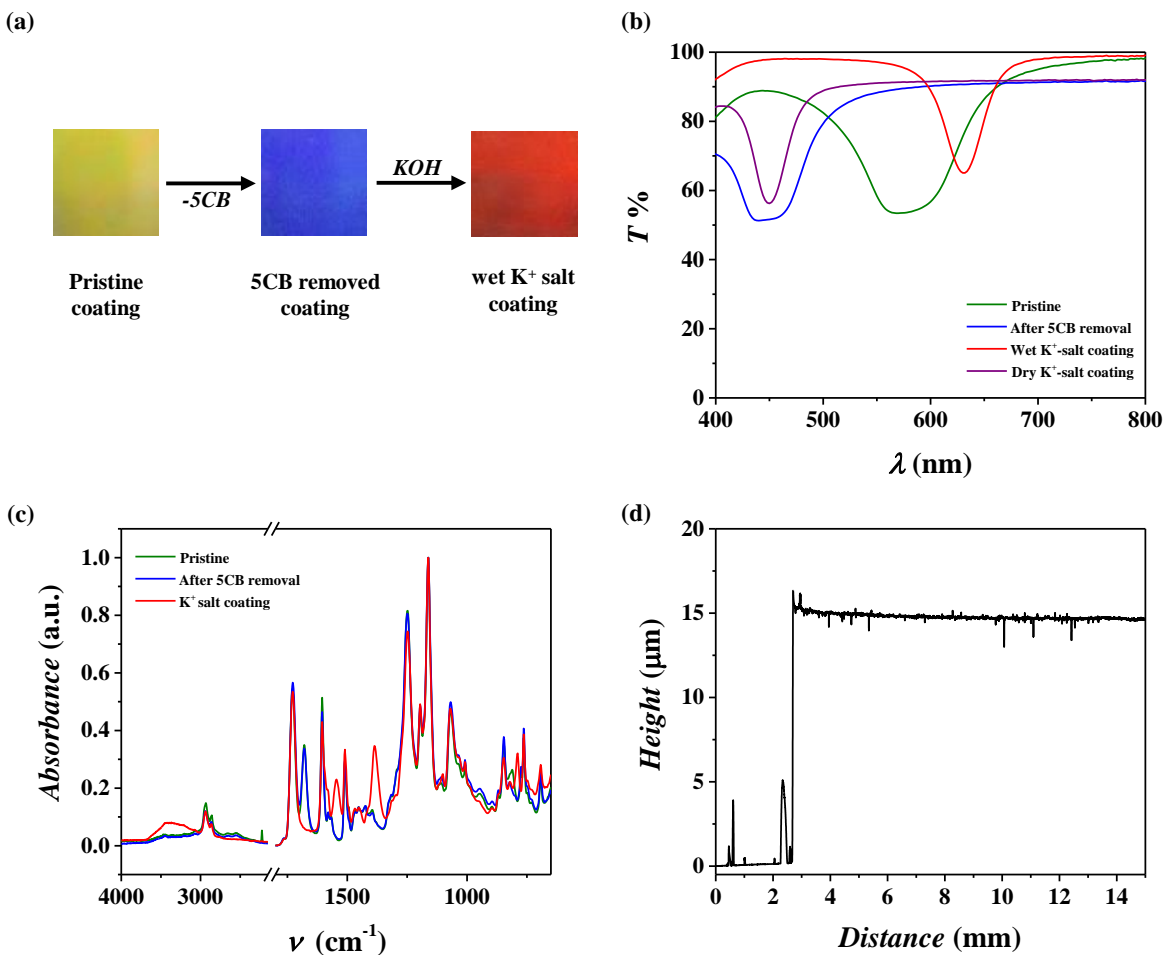

**Figure S1.** (a) Photographs, (b) UV-vis transmission spectra and (c) FT-IR spectra of the CLC polymer coating at different steps of fabrication. (d) Height profile of a dry potassium salt CLC polymer coating.

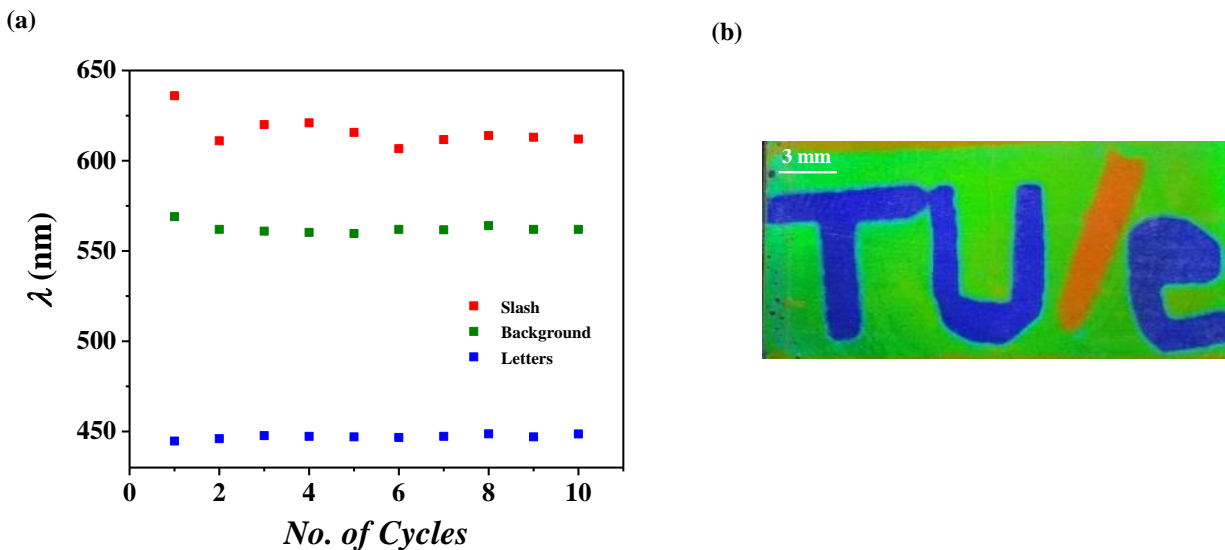

**Figure S2.** (a) Wavelength of light reflected by the “TU/e” pattern on repeated exposure to exhaled breath and drying. (b) Image of the pattern after tenth cycle of exposure to exhaled breath.

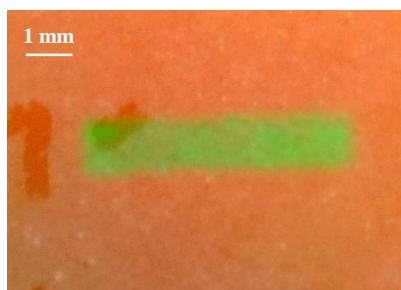

**Figure S3.** Wet state image of a 1 mm wide green line pattern, inkjet printed on CLC polymer coating with 100 mM  $\text{Ca}(\text{NO}_3)_2$  aqueous solution as ink.

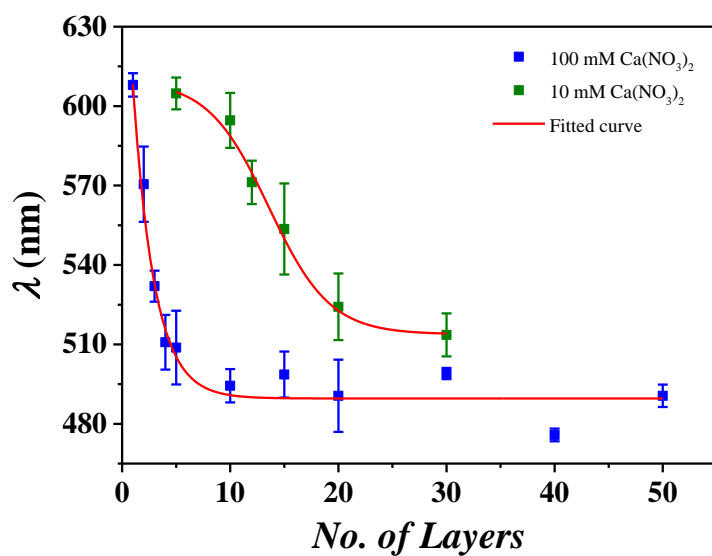

**Figure S4.** Wavelength of light reflected by pattern inkjet printed with different number of layers of the ink 100 and 10 mM  $\text{Ca}(\text{NO}_3)_2$  aqueous solutions. The red line represents the fitted curve. Error bar indicates mean  $\pm$  standard deviations for five measurements at different places on the pattern.

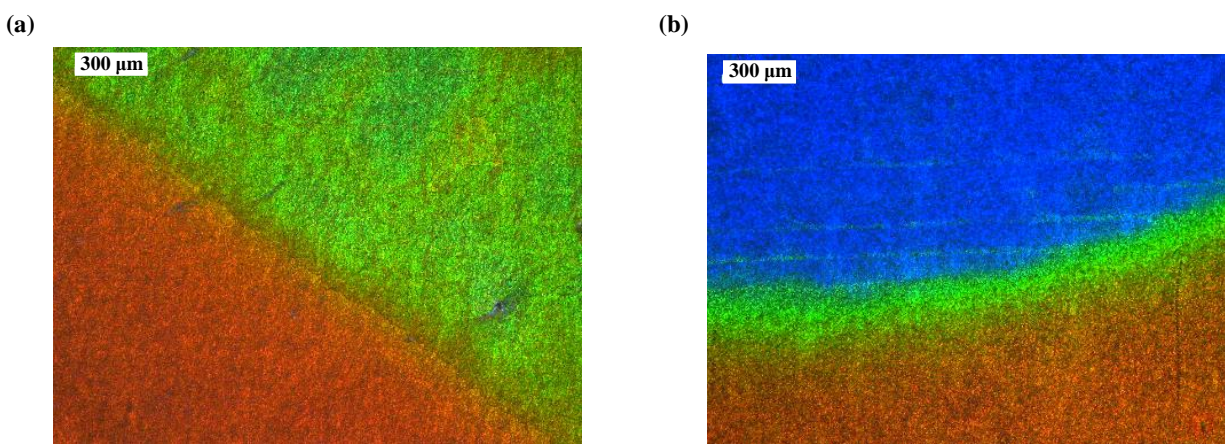

**Figure S5.** Polarized optical microscopy image (in incidence light mode) of (a) leaf and (b) petal patterns on the CLC polymer coating.

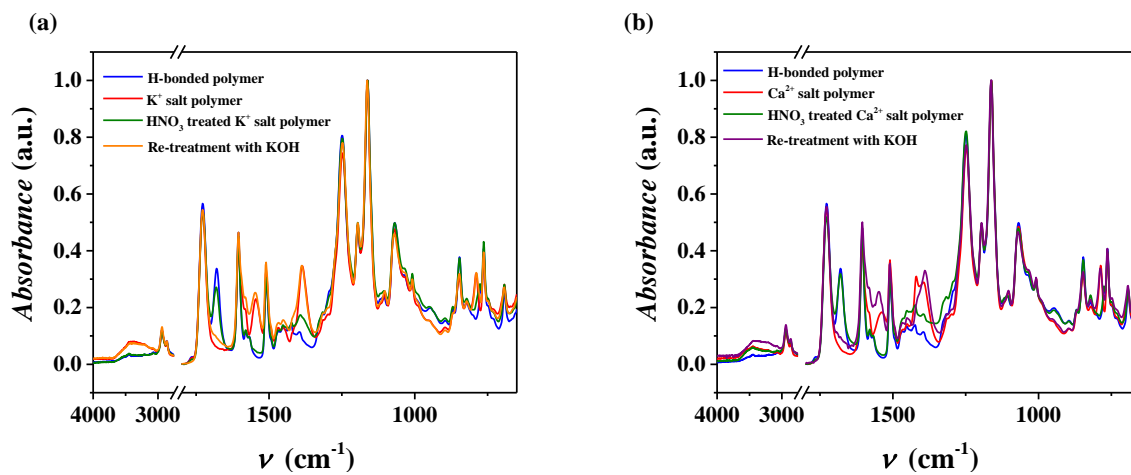

**Figure S6.** FT-IR spectra of (a) potassium salt CLC polymer coating and (b) calcium salt CLC polymer coating on treatment with acid ( $\text{HNO}_3$ ) showing formation of hydrogen bonds and re-treatment with base (KOH) showing re-formation of benzoate salt moieties.

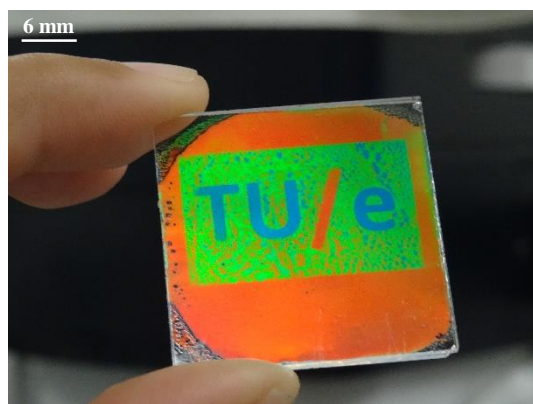

**Figure S7.** Image of an inkjet-printed “TU/e” pattern in wet state.
